# Supplementary material for: Deciphering the Global Proteomic Profile Involved in Methylmercury-Induced Cerebellar Neurodegeneration and Motor Dysfunction in Adult Rats
Source: MDPI journal article supplement (doi:10.3390/toxics10090531), 2022-09-09
Supplement: s1 [file s1]

**Supplementary Table S1.** Identified proteins with expression significantly altered in the cerebellum of rats of group exposed to methylmercury (MeHg) vs. Control (C) group.

| Accession | Description                                                          | Score | Fold Change |
|-----------|----------------------------------------------------------------------|-------|-------------|
| P60203    | Myelin proteolipid protein                                           | 3177  | 4.48        |
| Q64541    | Sodium/potassium-transporting ATPase subunit alpha-4                 | 219   | 4.39        |
| P06686    | Sodium/potassium-transporting ATPase subunit alpha-2                 | 382   | 4.35        |
| P06687    | Sodium/potassium-transporting ATPase subunit alpha-3                 | 431   | 4.31        |
| P12847    | Myosin-3                                                             | 52    | 3.03        |
| P07825    | Synaptophysin                                                        | 326   | 2.94        |
| P07340    | Sodium/potassium-transporting ATPase subunit beta-1                  | 2809  | 2.66        |
| Q63803    | Guanine nucleotide-binding protein G(s) subunit alpha isoforms XLas  | 267   | 2.29        |
| P63095    | Guanine nucleotide-binding protein G(s) subunit alpha isoforms short | 267   | 2.25        |
| P38406    | Guanine nucleotide-binding protein G(olf) subunit alpha              | 254   | 2.23        |
| P29348    | Guanine nucleotide-binding protein G(t) subunit alpha-3              | 254   | 2.23        |
| Q6Q7Y5    | Guanine nucleotide-binding protein subunit alpha-13                  | 260   | 2.23        |
| P10824    | Guanine nucleotide-binding protein G(i) subunit alpha-1              | 254   | 2.18        |
| P10536    | Ras-related protein Rab-1B                                           | 1030  | 2.16        |
| P05714    | Ras-related protein Rab-4A                                           | 1030  | 2.16        |
| P51146    | Ras-related protein Rab-4B                                           | 1030  | 2.16        |
| P08753    | Guanine nucleotide-binding protein G(k) subunit alpha                | 254   | 2.14        |
| P35284    | Ras-related protein Rab-12                                           | 1030  | 2.14        |
| P51156    | Ras-related protein Rab-26                                           | 1030  | 2.14        |
| Q9WVB1    | Ras-related protein Rab-6A                                           | 956   | 2.14        |
| P04897    | Guanine nucleotide-binding protein G(i) subunit alpha-2              | 254   | 2.12        |
| Q63210    | Guanine nucleotide-binding protein subunit alpha-12                  | 290   | 2.10        |
| P61107    | Ras-related protein Rab-14                                           | 1096  | 2.05        |

|               |                                                                      |      |      |
|---------------|----------------------------------------------------------------------|------|------|
| <b>Q05962</b> | ADP/ATP translocase 1                                                | 1756 | 2.03 |
| <b>Q09073</b> | ADP/ATP translocase 2                                                | 1565 | 2.03 |
| <b>P59215</b> | Guanine nucleotide-binding protein G(o) subunit alpha                | 1308 | 2.01 |
| <b>P13233</b> | 2'_3'-cyclic-nucleotide 3'-phosphodiesterase                         | 6549 | 1.99 |
| <b>P10888</b> | Cytochrome c oxidase subunit 4 isoform 1_ mitochondrial              | 792  | 1.97 |
| <b>P97546</b> | Neuroplastin                                                         | 100  | 1.93 |
| <b>Q9JHY2</b> | Sideroflexin-3                                                       | 133  | 1.92 |
| <b>Q6P6V0</b> | Glucose-6-phosphate isomerase                                        | 855  | 1.90 |
| <b>Q9Z270</b> | Vesicle-associated membrane protein-associated protein A             | 199  | 1.84 |
| <b>P19511</b> | ATP synthase F(0) complex subunit B1_ mitochondrial                  | 194  | 1.80 |
| <b>Q62910</b> | Synaptojanin-1                                                       | 76   | 1.77 |
| <b>Q9QYU2</b> | Elongation factor Ts_ mitochondrial                                  | 150  | 1.70 |
| <b>P11442</b> | Clathrin heavy chain 1                                               | 1098 | 1.68 |
| <b>Q63198</b> | Contactin-1                                                          | 131  | 1.67 |
| <b>P47861</b> | Synaptotagmin-5                                                      | 66   | 1.65 |
| <b>Q05683</b> | Glutamate decarboxylase 2                                            | 129  | 1.62 |
| <b>P35171</b> | Cytochrome c oxidase subunit 7A2_ mitochondrial                      | 496  | 1.58 |
| <b>P11506</b> | Plasma membrane calcium-transporting ATPase 2                        | 114  | 1.49 |
| <b>Q1WIM3</b> | Cell adhesion molecule 3                                             | 506  | 1.48 |
| <b>Q641Y2</b> | NADH dehydrogenase [ubiquinone] iron-sulfur protein 2_ mitochondrial | 73   | 1.48 |
| <b>Q8VHF5</b> | Citrate synthase_ mitochondrial                                      | 2516 | 1.46 |
| <b>O35567</b> | Bifunctional purine biosynthesis protein PURH                        | 84   | 1.46 |
| <b>Q5PPN4</b> | Carbonic anhydrase-related protein                                   | 1752 | 1.42 |
| <b>P00406</b> | Cytochrome c oxidase subunit 2                                       | 319  | 1.40 |
| <b>P11275</b> | Calcium/calmodulin-dependent protein kinase type II subunit alpha    | 521  | 1.39 |
| <b>P08413</b> | Calcium/calmodulin-dependent protein kinase type II subunit beta     | 1208 | 1.39 |
| <b>P62804</b> | Histone H4                                                           | 1347 | 1.39 |

|               |                                                                         |      |      |
|---------------|-------------------------------------------------------------------------|------|------|
| <b>Q64568</b> | Plasma membrane calcium-transporting ATPase 3                           | 93   | 1.39 |
| <b>O35921</b> | Excitatory amino acid transporter 4                                     | 115  | 1.38 |
| <b>Q99MZ8</b> | LIM and SH3 domain protein 1                                            | 256  | 1.38 |
| <b>P61765</b> | Syntaxin-binding protein 1                                              | 8800 | 1.38 |
| <b>P82471</b> | Guanine nucleotide-binding protein G(q) subunit alpha                   | 124  | 1.38 |
| <b>P29995</b> | Inositol 1_4_5-trisphosphate receptor type 2                            | 76   | 1.38 |
| <b>Q5U206</b> | Calmodulin-like protein 3                                               | 1390 | 1.35 |
| <b>P25286</b> | V-type proton ATPase 116 kDa subunit a isoform 1                        | 78   | 1.35 |
| <b>Q02253</b> | Methylmalonate-semialdehyde dehydrogenase [acylating]_ mitochondrial    | 62   | 1.35 |
| <b>Q568Z9</b> | Phytanoyl-CoA hydroxylase-interacting protein                           | 564  | 1.35 |
| <b>P31596</b> | Excitatory amino acid transporter 2                                     | 160  | 1.34 |
| <b>P05708</b> | Hexokinase-1                                                            | 757  | 1.34 |
| <b>P16036</b> | Phosphate carrier protein_ mitochondrial                                | 642  | 1.34 |
| <b>P63329</b> | Serine/threonine-protein phosphatase 2B catalytic subunit alpha isoform | 850  | 1.34 |
| <b>Q9QWN8</b> | Spectrin beta chain_ non-erythrocytic 2                                 | 99   | 1.34 |
| <b>Q63413</b> | Spliceosome RNA helicase Ddx39b                                         | 448  | 1.32 |
| <b>Q64548</b> | Reticulon-1                                                             | 204  | 1.31 |
| <b>P60881</b> | Synaptosomal-associated protein 25                                      | 305  | 1.31 |
| <b>P05197</b> | Elongation factor 2                                                     | 172  | 1.31 |
| <b>P15791</b> | Calcium/calmodulin-dependent protein kinase type II subunit delta       | 572  | 1.30 |
| <b>P62898</b> | Cytochrome c_ somatic                                                   | 865  | 1.30 |
| <b>P06685</b> | Sodium/potassium-transporting ATPase subunit alpha-1                    | 328  | 1.30 |
| <b>P63319</b> | Protein kinase C gamma type                                             | 194  | 1.28 |
| <b>P61265</b> | Syntaxin-1B                                                             | 456  | 1.27 |
| <b>P11730</b> | Calcium/calmodulin-dependent protein kinase type II subunit gamma       | 606  | 1.26 |
| <b>P54708</b> | Potassium-transporting ATPase alpha chain 2                             | 238  | 1.26 |
| <b>P62716</b> | Serine/threonine-protein phosphatase 2A catalytic subunit beta isoform  | 137  | 1.26 |
| <b>P63331</b> | Serine/threonine-protein phosphatase 2A catalytic subunit alpha isoform | 137  | 1.26 |

|               |                                                                             |      |      |
|---------------|-----------------------------------------------------------------------------|------|------|
| <b>P09626</b> | Potassium-transporting ATPase alpha chain 1                                 | 89   | 1.25 |
| <b>P20651</b> | Serine/threonine-protein phosphatase 2B catalytic subunit beta isoform      | 173  | 1.25 |
| <b>Q9QUL6</b> | Vesicle-fusing ATPase                                                       | 929  | 1.25 |
| <b>B2RYG6</b> | Ubiquitin thioesterase OTUB1                                                | 208  | 1.25 |
| <b>P35571</b> | Glycerol-3-phosphate dehydrogenase_ mitochondrial                           | 94   | 1.25 |
| <b>Q5XI78</b> | 2-oxoglutarate dehydrogenase_ mitochondrial                                 | 462  | 1.23 |
| <b>Q6PDU7</b> | ATP synthase subunit g_ mitochondrial                                       | 1006 | 1.23 |
| <b>Q9JI66</b> | Electrogenic sodium bicarbonate cotransporter 1                             | 118  | 1.23 |
| <b>P97685</b> | Neurofascin                                                                 | 143  | 1.23 |
| <b>P48037</b> | Annexin A6                                                                  | 125  | 1.23 |
| <b>P05696</b> | Protein kinase C alpha type                                                 | 64   | 1.23 |
| <b>P48675</b> | Desmin                                                                      | 219  | 1.22 |
| <b>P84245</b> | Histone H3.3                                                                | 1855 | 1.22 |
| <b>Q5BK63</b> | NADH dehydrogenase [ubiquinone] 1 alpha subcomplex subunit 9_ mitochondrial | 229  | 1.22 |
| <b>P29101</b> | Synaptotagmin-2                                                             | 439  | 1.22 |
| <b>Q5XIM9</b> | T-complex protein 1 subunit beta                                            | 144  | 1.22 |
| <b>Q9Z0V5</b> | Peroxiredoxin-4                                                             | 256  | 1.22 |
| <b>P55068</b> | Brevican core protein                                                       | 314  | 1.21 |
| <b>Q641Z6</b> | EH domain-containing protein 1                                              | 82   | 1.21 |
| <b>P12785</b> | Fatty acid synthase                                                         | 97   | 1.21 |
| <b>P63086</b> | Mitogen-activated protein kinase 1                                          | 104  | 1.21 |
| <b>Q9R1Z0</b> | Voltage-dependent anion-selective channel protein 3                         | 1638 | 1.21 |
| <b>P50554</b> | 4-aminobutyrate aminotransferase_ mitochondrial                             | 1432 | 1.20 |
| <b>P47860</b> | ATP-dependent 6-phosphofructokinase_ platelet type                          | 267  | 1.20 |
| <b>P04906</b> | Glutathione S-transferase P                                                 | 1850 | 1.19 |
| <b>P29994</b> | Inositol 1_4_5-trisphosphate receptor type 1                                | 198  | 1.19 |
| <b>Q920L2</b> | Succinate dehydrogenase [ubiquinone] flavoprotein subunit_ mitochondrial    | 392  | 1.19 |
| <b>P21708</b> | Mitogen-activated protein kinase 3                                          | 165  | 1.19 |

|               |                                                     |      |      |
|---------------|-----------------------------------------------------|------|------|
| <b>O35095</b> | Neurochondrin                                       | 225  | 1.19 |
| <b>Q68FY0</b> | Cytochrome b-c1 complex subunit 1_ mitochondrial    | 977  | 1.17 |
| <b>Q00729</b> | Histone H2B type 1-A                                | 1450 | 1.17 |
| <b>P04642</b> | L-lactate dehydrogenase A chain                     | 2181 | 1.17 |
| <b>Q63716</b> | Peroxiredoxin-1                                     | 1232 | 1.17 |
| <b>Q4V7C7</b> | Actin-related protein 3                             | 686  | 1.16 |
| <b>Q02356</b> | AMP deaminase 2                                     | 78   | 1.16 |
| <b>P25809</b> | Creatine kinase U-type_ mitochondrial               | 1484 | 1.16 |
| <b>O35353</b> | Guanine nucleotide-binding protein subunit beta-4   | 2021 | 1.16 |
| <b>Q00715</b> | Histone H2B type 1                                  | 9089 | 1.16 |
| <b>P13596</b> | Neural cell adhesion molecule 1                     | 249  | 1.16 |
| <b>P81155</b> | Voltage-dependent anion-selective channel protein 2 | 2072 | 1.16 |
| <b>P62963</b> | Profilin-1                                          | 937  | 1.16 |
| <b>P00507</b> | Aspartate aminotransferase_ mitochondrial           | 6480 | 1.15 |
| <b>P13264</b> | Glutaminase kidney isoform_ mitochondrial           | 222  | 1.15 |
| <b>P09812</b> | Glycogen phosphorylase_ muscle form                 | 128  | 1.15 |
| <b>Q5RJQ4</b> | NAD-dependent protein deacetylase sirtuin-2         | 402  | 1.15 |
| <b>P0CG51</b> | Polyubiquitin-B                                     | 9598 | 1.15 |
| <b>P50399</b> | Rab GDP dissociation inhibitor beta                 | 3485 | 1.15 |
| <b>P50137</b> | Transketolase                                       | 819  | 1.15 |
| <b>Q6P9T8</b> | Tubulin beta-4B chain                               | 3103 | 1.15 |
|               |                                                     | 1    |      |
| <b>P69897</b> | Tubulin beta-5 chain                                | 2835 | 1.15 |
|               |                                                     | 1    |      |
| <b>P62982</b> | Ubiquitin-40S ribosomal protein S27a                | 9598 | 1.15 |
| <b>P62986</b> | Ubiquitin-60S ribosomal protein L40                 | 9598 | 1.15 |
| <b>P63041</b> | Complexin-1                                         | 425  | 1.15 |

|               |                                                                              |           |      |
|---------------|------------------------------------------------------------------------------|-----------|------|
| <b>P60711</b> | Actin_ cytoplasmic 1                                                         | 2734<br>1 | 1.14 |
| <b>P63259</b> | Actin_ cytoplasmic 2                                                         | 2734<br>1 | 1.14 |
| <b>P63269</b> | Actin_ gamma-enteric smooth muscle                                           | 1074<br>3 | 1.14 |
| <b>B0K020</b> | CDGSH iron-sulfur domain-containing protein 1                                | 984       | 1.14 |
| <b>P24942</b> | Excitatory amino acid transporter 1                                          | 275       | 1.14 |
| <b>Q561S0</b> | NADH dehydrogenase [ubiquinone] 1 alpha subcomplex subunit 10_ mitochondrial | 795       | 1.14 |
| <b>P16884</b> | Neurofilament heavy polypeptide                                              | 638       | 1.14 |
| <b>P50398</b> | Rab GDP dissociation inhibitor alpha                                         | 5740      | 1.14 |
| <b>P63012</b> | Ras-related protein Rab-3A                                                   | 1233      | 1.14 |
| <b>Q68FR8</b> | Tubulin alpha-3 chain                                                        | 1323<br>9 | 1.14 |
| <b>Q4QRB4</b> | Tubulin beta-3 chain                                                         | 2014<br>2 | 1.14 |
| <b>Q5RKI0</b> | WD repeat-containing protein 1                                               | 206       | 1.14 |
| <b>Q9ER34</b> | Aconitate hydratase_ mitochondrial                                           | 3872      | 1.13 |
| <b>P68035</b> | Actin_ alpha cardiac muscle 1                                                | 1181<br>9 | 1.13 |
| <b>P68136</b> | Actin_ alpha skeletal muscle                                                 | 1186<br>4 | 1.13 |
| <b>P62738</b> | Actin_ aortic smooth muscle                                                  | 1080<br>7 | 1.13 |
| <b>P62944</b> | AP-2 complex subunit beta                                                    | 286       | 1.13 |
| <b>P47858</b> | ATP-dependent 6-phosphofructokinase_ muscle type                             | 552       | 1.13 |
| <b>P09117</b> | Fructose-bisphosphate aldolase C                                             | 1180<br>8 | 1.13 |

|               |                                                                  |      |      |
|---------------|------------------------------------------------------------------|------|------|
| <b>P09606</b> | Glutamine synthetase                                             | 4449 | 1.13 |
| <b>Q63942</b> | GTP-binding protein Rab-3D                                       | 1030 | 1.13 |
| <b>P54311</b> | Guanine nucleotide-binding protein G(I)/G(S)/G(T) subunit beta-1 | 3116 | 1.13 |
| <b>P54313</b> | Guanine nucleotide-binding protein G(I)/G(S)/G(T) subunit beta-2 | 1913 | 1.13 |
| <b>Q6LED0</b> | Histone H3.1                                                     | 380  | 1.13 |
| <b>P42123</b> | L-lactate dehydrogenase B chain                                  | 9037 | 1.13 |
| <b>P04631</b> | Protein S100-B                                                   | 1701 | 1.13 |
|               |                                                                  | 1    |      |
| <b>P63055</b> | Purkinje cell protein 4                                          | 1493 | 1.13 |
| <b>Q63941</b> | Ras-related protein Rab-3B                                       | 1030 | 1.13 |
| <b>Q53B90</b> | Ras-related protein Rab-43                                       | 1030 | 1.13 |
| <b>P13638</b> | Sodium/potassium-transporting ATPase subunit beta-2              | 317  | 1.13 |
| <b>P68370</b> | Tubulin alpha-1A chain                                           | 1734 | 1.13 |
|               |                                                                  | 4    |      |
| <b>Q6P9V9</b> | Tubulin alpha-1B chain                                           | 1901 | 1.13 |
|               |                                                                  | 9    |      |
| <b>Q5U300</b> | Ubiquitin-like modifier-activating enzyme 1                      | 313  | 1.13 |
| <b>P10818</b> | Cytochrome c oxidase subunit 6A1_ mitochondrial                  | 2261 | 1.12 |
| <b>P05065</b> | Fructose-bisphosphate aldolase A                                 | 5704 | 1.12 |
| <b>P52287</b> | Guanine nucleotide-binding protein G(I)/G(S)/G(T) subunit beta-3 | 719  | 1.12 |
| <b>O88989</b> | Malate dehydrogenase_ cytoplasmic                                | 6766 | 1.12 |
| <b>Q66HF1</b> | NADH-ubiquinone oxidoreductase 75 kDa subunit_ mitochondrial     | 512  | 1.12 |
| <b>P35281</b> | Ras-related protein Rab-10                                       | 1030 | 1.12 |
| <b>Q5U316</b> | Ras-related protein Rab-35                                       | 1088 | 1.12 |
| <b>P62824</b> | Ras-related protein Rab-3C                                       | 1030 | 1.12 |
| <b>P07632</b> | Superoxide dismutase [Cu-Zn]                                     | 2891 | 1.12 |
| <b>P21707</b> | Synaptotagmin-1                                                  | 231  | 1.12 |

|               |                                                |           |      |
|---------------|------------------------------------------------|-----------|------|
| <b>P48500</b> | Triosephosphate isomerase                      | 1176<br>4 | 1.12 |
| <b>Q6AYZ1</b> | Tubulin alpha-1C chain                         | 1325<br>7 | 1.12 |
| <b>Q5XIF6</b> | Tubulin alpha-4A chain                         | 1710<br>3 | 1.12 |
| <b>Q6AY56</b> | Tubulin alpha-8 chain                          | 7864      | 1.12 |
| <b>P85108</b> | Tubulin beta-2A chain                          | 2777<br>9 | 1.12 |
| <b>Q3KRE8</b> | Tubulin beta-2B chain                          | 2690<br>3 | 1.12 |
| <b>Q66HA8</b> | Heat shock protein 105 kDa                     | 76        | 1.12 |
| <b>P35289</b> | Ras-related protein Rab-15                     | 957       | 1.12 |
| <b>Q6NYB7</b> | Ras-related protein Rab-1A                     | 1030      | 1.12 |
| <b>P52303</b> | AP-1 complex subunit beta-1                    | 139       | 1.12 |
| <b>P45592</b> | Cofilin-1                                      | 6763      | 1.11 |
| <b>P11240</b> | Cytochrome c oxidase subunit 5A_ mitochondrial | 3967      | 1.11 |
| <b>Q6P6R2</b> | Dihydrolipoyl dehydrogenase_ mitochondrial     | 1018      | 1.11 |
| <b>P04636</b> | Malate dehydrogenase_ mitochondrial            | 1527<br>8 | 1.11 |
| <b>P54921</b> | Alpha-soluble NSF attachment protein           | 482       | 1.11 |
| <b>P11030</b> | Acyl-CoA-binding protein                       | 741       | 1.09 |
| <b>P31399</b> | ATP synthase subunit d_ mitochondrial          | 3831      | 1.09 |
| <b>P30904</b> | Macrophage migration inhibitory factor         | 4630      | 1.09 |
| <b>P11980</b> | Pyruvate kinase PKM                            | 1025<br>7 | 1.09 |
| <b>B0BNF1</b> | Septin-8                                       | 486       | 1.09 |
| <b>P35280</b> | Ras-related protein Rab-8A                     | 1030      | 1.09 |



|               |                                                           |      |      |
|---------------|-----------------------------------------------------------|------|------|
| <b>P70550</b> | Ras-related protein Rab-8B                                | 1030 | 1.09 |
| <b>P13221</b> | Aspartate aminotransferase_ cytoplasmic                   | 5532 | 1.08 |
| <b>P62161</b> | Calmodulin                                                | 1041 | 1.08 |
|               |                                                           | 4    |      |
| <b>P20788</b> | Cytochrome b-c1 complex subunit Rieske_ mitochondrial     | 1645 | 1.08 |
| <b>P14408</b> | Fumarate hydratase_ mitochondrial                         | 541  | 1.08 |
| <b>Q5XHZ0</b> | Heat shock protein 75 kDa_ mitochondrial                  | 1871 | 1.08 |
| <b>P25113</b> | Phosphoglycerate mutase 1                                 | 9132 | 1.08 |
| <b>P52873</b> | Pyruvate carboxylase_ mitochondrial                       | 92   | 1.08 |
| <b>P12928</b> | Pyruvate kinase PKLR                                      | 939  | 1.08 |
| <b>Q05140</b> | Clathrin coat assembly protein AP180                      | 129  | 1.08 |
| <b>P19944</b> | 60S acidic ribosomal protein P1                           | 1399 | 1.08 |
| <b>P84087</b> | Complexin-2                                               | 2305 | 1.08 |
| <b>Q78P75</b> | Dynein light chain 2_ cytoplasmic                         | 777  | 1.08 |
| <b>Q5M964</b> | Fumarate hydratase 1                                      | 541  | 1.07 |
| <b>Q9ESV6</b> | Glyceraldehyde-3-phosphate dehydrogenase_ testis-specific | 1881 | 1.07 |
| <b>P02262</b> | Histone H2A type 1                                        | 2427 | 1.07 |
|               |                                                           | 6    |      |
| <b>P0C169</b> | Histone H2A type 1-C                                      | 2427 | 1.07 |
|               |                                                           | 6    |      |
| <b>P0C170</b> | Histone H2A type 1-E                                      | 2427 | 1.07 |
|               |                                                           | 6    |      |
| <b>Q64598</b> | Histone H2A type 1-F                                      | 2427 | 1.07 |
|               |                                                           | 6    |      |
| <b>P0CC09</b> | Histone H2A type 2-A                                      | 2427 | 1.07 |
|               |                                                           | 6    |      |
| <b>Q4FZT6</b> | Histone H2A type 3                                        | 2427 | 1.07 |
|               |                                                           | 6    |      |

|               |                                                                                |           |      |
|---------------|--------------------------------------------------------------------------------|-----------|------|
| <b>Q00728</b> | Histone H2A type 4                                                             | 2427<br>6 | 1.07 |
| <b>A9UMV8</b> | Histone H2A.J                                                                  | 2427<br>6 | 1.07 |
| <b>P10111</b> | Peptidyl-prolyl cis-trans isomerase A                                          | 5940      | 1.07 |
| <b>P26284</b> | Pyruvate dehydrogenase E1 component subunit alpha_ somatic form_ mitochondrial | 902       | 1.07 |
| <b>P16086</b> | Spectrin alpha chain_ non-erythrocytic 1                                       | 906       | 1.07 |
| <b>P09811</b> | Glycogen phosphorylase_ liver form                                             | 158       | 1.07 |
| <b>P23565</b> | Alpha-internexin                                                               | 2848      | 1.06 |
| <b>P04797</b> | Glyceraldehyde-3-phosphate dehydrogenase                                       | 2355<br>8 | 1.06 |
| <b>P19527</b> | Neurofilament light polypeptide                                                | 4078      | 1.06 |
| <b>P49432</b> | Pyruvate dehydrogenase E1 component subunit beta_ mitochondrial                | 2178      | 1.06 |
| <b>Q63537</b> | Synapsin-2                                                                     | 1909      | 1.06 |
| <b>Q9Z2L0</b> | Voltage-dependent anion-selective channel protein 1                            | 4505      | 1.06 |
| <b>P07171</b> | Calbindin                                                                      | 5179      | 1.05 |
| <b>Q99NA5</b> | Isocitrate dehydrogenase [NAD] subunit alpha_ mitochondrial                    | 1461      | 1.05 |
| <b>P31044</b> | Phosphatidylethanolamine-binding protein 1                                     | 1500<br>8 | 1.05 |
| <b>O88767</b> | Protein DJ-1                                                                   | 6592      | 1.05 |
| <b>Q8VBU2</b> | Protein NDRG2                                                                  | 1790      | 1.05 |
| <b>P11348</b> | Dihydropteridine reductase                                                     | 1097      | 1.05 |
| <b>Q63028</b> | Alpha-adducin                                                                  | 306       | 1.05 |
| <b>P47942</b> | Dihydropyrimidinase-related protein 2                                          | 1317<br>7 | 1.04 |
| <b>P10860</b> | Glutamate dehydrogenase 1_ mitochondrial                                       | 1391      | 1.04 |
| <b>Q6IMY8</b> | Heterogeneous nuclear ribonucleoprotein U                                      | 454       | 1.04 |
| <b>P21575</b> | Dynamin-1                                                                      | 2040      | 1.03 |

|               |                                                                                                          |      |       |
|---------------|----------------------------------------------------------------------------------------------------------|------|-------|
| <b>P62630</b> | Elongation factor 1-alpha 1                                                                              | 4142 | 1.03  |
| <b>P62815</b> | V-type proton ATPase subunit B_ brain isoform                                                            | 889  | 1.03  |
| <b>P08461</b> | Dihydrolipoyllysine-residue acetyltransferase component of pyruvate dehydrogenase complex_ mitochondrial | 1006 | 1.02  |
| <b>P14659</b> | Heat shock-related 70 kDa protein 2                                                                      | 2013 | 1.02  |
| <b>P82995</b> | Heat shock protein HSP 90-alpha                                                                          | 3377 | 1.02  |
| <b>P20761</b> | Ig gamma-2B chain C region                                                                               | 113  | -0.44 |
| <b>B0BNE5</b> | S-formylglutathione hydrolase                                                                            | 200  | -0.46 |
| <b>P02680</b> | Fibrinogen gamma chain                                                                                   | 118  | -0.49 |
| <b>P18421</b> | Proteasome subunit beta type-1                                                                           | 128  | -0.52 |
| <b>P63170</b> | Dynein light chain 1_ cytoplasmic                                                                        | 377  | -0.65 |
| <b>P11517</b> | Hemoglobin subunit beta-2                                                                                | 1177 | -0.65 |
|               |                                                                                                          | 4    |       |
| <b>Q62936</b> | Disks large homolog 3                                                                                    | 361  | -0.68 |
| <b>P01946</b> | Hemoglobin subunit alpha-1/2                                                                             | 4748 | -0.69 |
|               |                                                                                                          | 5    |       |
| <b>Q6Q0N1</b> | Cytosolic non-specific dipeptidase                                                                       | 266  | -0.70 |
| <b>P07722</b> | Myelin-associated glycoprotein                                                                           | 158  | -0.73 |
| <b>Q68A21</b> | Transcriptional activator protein Pur-beta                                                               | 285  | -0.73 |
| <b>P02091</b> | Hemoglobin subunit beta-1                                                                                | 1795 | -0.73 |
|               |                                                                                                          | 9    |       |
| <b>Q99MZ4</b> | Gamma-glutamyltransferase 7                                                                              | 98   | -0.75 |
| <b>P97686</b> | Neuronal cell adhesion molecule                                                                          | 62   | -0.76 |
| <b>P15146</b> | Microtubule-associated protein 2                                                                         | 387  | -0.76 |
| <b>P13803</b> | Electron transfer flavoprotein subunit alpha_ mitochondrial                                              | 287  | -0.78 |
| <b>P70615</b> | Lamin-B1                                                                                                 | 150  | -0.79 |
| <b>P47875</b> | Cysteine and glycine-rich protein 1                                                                      | 110  | -0.79 |
| <b>P08081</b> | Clathrin light chain A                                                                                   | 360  | -0.80 |

|               |                                                                   |      |       |
|---------------|-------------------------------------------------------------------|------|-------|
| <b>BOBNN3</b> | Carbonic anhydrase 1                                              | 441  | -0.81 |
| <b>Q5XIH7</b> | Prohibitin-2                                                      | 362  | -0.81 |
| <b>Q63560</b> | Microtubule-associated protein 6                                  | 212  | -0.82 |
| <b>Q9Z0W5</b> | Protein kinase C and casein kinase substrate in neurons protein 1 | 262  | -0.82 |
| <b>P22062</b> | Protein-L-isoaspartate(D-aspartate) O-methyltransferase           | 2289 | -0.82 |
| <b>P31000</b> | Vimentin                                                          | 1278 | -0.82 |
| <b>O08838</b> | Amphiphysin                                                       | 251  | -0.83 |
| <b>P39069</b> | Adenylate kinase isoenzyme 1                                      | 2086 | -0.84 |
| <b>Q63345</b> | Myelin-oligodendrocyte glycoprotein                               | 446  | -0.84 |
| <b>P35435</b> | ATP synthase subunit gamma_ mitochondrial                         | 490  | -0.85 |
| <b>P13084</b> | Nucleophosmin                                                     | 162  | -0.86 |
| <b>Q9JHU0</b> | Dihydropyrimidinase-related protein 5                             | 185  | -0.86 |
| <b>Q8K586</b> | GTP-binding nuclear protein Ran_ testis-specific isoform          | 714  | -0.86 |
| <b>Q5U318</b> | Astrocytic phosphoprotein PEA-15                                  | 376  | -0.87 |
| <b>P11884</b> | Aldehyde dehydrogenase_ mitochondrial                             | 242  | -0.88 |
| <b>Q9Z0V6</b> | Thioredoxin-dependent peroxide reductase_ mitochondrial           | 1026 | -0.88 |
| <b>P15205</b> | Microtubule-associated protein 1B                                 | 103  | -0.90 |
| <b>P37377</b> | Alpha-synuclein                                                   | 903  | -0.90 |
| <b>P48721</b> | Stress-70 protein_ mitochondrial                                  | 369  | -0.90 |
| <b>Q00981</b> | Ubiquitin carboxyl-terminal hydrolase isozyme L1                  | 1593 | -0.90 |
| <b>P35434</b> | ATP synthase subunit delta_ mitochondrial                         | 360  | -0.90 |
| <b>P19332</b> | Microtubule-associated protein tau                                | 544  | -0.90 |
| <b>P02625</b> | Parvalbumin alpha                                                 | 9319 | -0.90 |
| <b>P09951</b> | Synapsin-1                                                        | 2155 | -0.90 |
| <b>P18418</b> | Calreticulin                                                      | 759  | -0.91 |
| <b>P47819</b> | Glial fibrillary acidic protein                                   | 7331 | -0.91 |
| <b>Q7TPB1</b> | T-complex protein 1 subunit delta                                 | 434  | -0.92 |
| <b>P11598</b> | Protein disulfide-isomerase A3                                    | 382  | -0.92 |

|               |                                                               |      |         |
|---------------|---------------------------------------------------------------|------|---------|
| <b>Q6URK4</b> | Heterogeneous nuclear ribonucleoprotein A3                    | 1085 | -0.92   |
| <b>P62959</b> | Histidine triad nucleotide-binding protein 1                  | 2216 | -0.92   |
| <b>P20760</b> | Ig gamma-2A chain C region                                    | 1035 | -0.92   |
| <b>P34926</b> | Microtubule-associated protein 1A                             | 189  | -0.92   |
| <b>F1LRL9</b> | Microtubule-associated protein 1B                             | 107  | -0.92   |
| <b>P19804</b> | Nucleoside diphosphate kinase B                               | 3358 | -0.92   |
| <b>O35964</b> | Endophilin-A2                                                 | 195  | -0.93   |
| <b>P84082</b> | ADP-ribosylation factor 2                                     | 658  | -0.93   |
| <b>A7VJC2</b> | Heterogeneous nuclear ribonucleoproteins A2/B1                | 2659 | -0.93   |
| <b>O08839</b> | Myc box-dependent-interacting protein 1                       | 1103 | -0.94   |
| <b>P19234</b> | NADH dehydrogenase [ubiquinone] flavoprotein 2_ mitochondrial | 1218 | -0.94   |
| <b>P26772</b> | 10 kDa heat shock protein_ mitochondrial                      | 2966 | -0.95   |
| <b>P35213</b> | 14-3-3 protein beta/alpha                                     | 4945 | -0.95   |
| <b>P68511</b> | 14-3-3 protein eta                                            | 5121 | -0.95   |
| <b>Q05982</b> | Nucleoside diphosphate kinase A                               | 1512 | -0.95   |
| <b>Q9JJ54</b> | Heterogeneous nuclear ribonucleoprotein D0                    | 479  | -0.96   |
| <b>O35179</b> | Endophilin-A1                                                 | 1195 | -0.96   |
| <b>P39052</b> | Dynamin-2                                                     | 435  | -0.97   |
| <b>P63039</b> | 60 kDa heat shock protein_ mitochondrial                      | 1275 | -0.97   |
| <b>P61980</b> | Heterogeneous nuclear ribonucleoprotein K                     | 2471 | -0.97   |
| <b>P62260</b> | 14-3-3 protein epsilon                                        | 6626 | -0.97   |
| <b>Q63754</b> | Beta-synuclein                                                | 6337 | -0.97   |
| <b>P61983</b> | 14-3-3 protein gamma                                          | 6504 | -0.98   |
| <b>P63102</b> | 14-3-3 protein zeta/delta                                     | 1018 | -0.98   |
|               |                                                               | 2    |         |
| <b>P10719</b> | ATP synthase subunit beta_ mitochondrial                      | 1812 | -0.98   |
|               |                                                               | 0    |         |
| <b>Q5XIB3</b> | Inactive ADP-ribosyltransferase ARH2                          | 122  | Control |

|               |                                                                                |     |         |
|---------------|--------------------------------------------------------------------------------|-----|---------|
| <b>Q64536</b> | [Pyruvate dehydrogenase (acetyl-transferring)] kinase isozyme 2, mitochondrial | 316 | Control |
| <b>O88484</b> | [Pyruvate dehydrogenase [acetyl-transferring]]-phosphatase 2, mitochondrial    | 70  | Control |
| <b>Q63569</b> | 26S protease regulatory subunit 6A                                             | 77  | Control |
| <b>P02401</b> | 60S acidic ribosomal protein P2                                                | 721 | Control |
| <b>Q6AYP7</b> | 7-methylguanosine phosphate-specific 5'-nucleotidase                           | 90  | Control |
| <b>P49911</b> | Acidic leucine-rich nuclear phosphoprotein 32 family member A                  | 192 | Control |
| <b>Q99PD4</b> | Actin-related protein 2/3 complex subunit 1A                                   | 71  | Control |
| <b>O88656</b> | Actin-related protein 2/3 complex subunit 1B                                   | 121 | Control |
| <b>P85970</b> | Actin-related protein 2/3 complex subunit 2                                    | 182 | Control |
| <b>Q6SKG1</b> | Acyl-coenzyme A synthetase ACSM3_ mitochondrial                                | 94  | Control |
| <b>Q9QYL8</b> | Acyl-protein thioesterase 2                                                    | 188 | Control |
| <b>Q9WUS0</b> | Adenylate kinase 4_ mitochondrial                                              | 320 | Control |
| <b>Q68FP8</b> | Adenylate kinase 8                                                             | 86  | Control |
| <b>O88923</b> | Adhesion G protein-coupled receptor L2                                         | 72  | Control |
| <b>Q8CG45</b> | Aflatoxin B1 aldehyde reductase member 2                                       | 197 | Control |
| <b>Q5QD51</b> | A-kinase anchor protein 12                                                     | 102 | Control |
| <b>P0C6C0</b> | A-kinase anchor protein SPHKAP                                                 | 74  | Control |
| <b>P50475</b> | Alanine--tRNA ligase_ cytoplasmic                                              | 122 | Control |
| <b>Q64563</b> | Alcohol dehydrogenase 4                                                        | 77  | Control |
| <b>Q66HG4</b> | Aldose 1-epimerase                                                             | 119 | Control |
| <b>P07943</b> | Aldose reductase                                                               | 124 | Control |
| <b>P21396</b> | Amine oxidase [flavin-containing] A                                            | 80  | Control |
| <b>Q6AYS7</b> | Aminoacylase-1A                                                                | 84  | Control |
| <b>Q6PTT0</b> | Aminoacylase-1B                                                                | 101 | Control |
| <b>Q07936</b> | Annexin A2                                                                     | 165 | Control |
| <b>P14668</b> | Annexin A5                                                                     | 158 | Control |
| <b>Q32Q06</b> | AP-1 complex subunit mu-1                                                      | 179 | Control |
| <b>Q32KJ9</b> | Arylsulfatase G                                                                | 83  | Control |

|               |                                                               |      |         |
|---------------|---------------------------------------------------------------|------|---------|
| <b>P29419</b> | ATP synthase subunit e_ mitochondrial                         | 395  | Control |
| <b>O70595</b> | ATP-binding cassette sub-family B member 6_ mitochondrial     | 104  | Control |
| <b>Q5U216</b> | ATP-dependent RNA helicase DDX39A                             | 263  | Control |
| <b>Q9R1T1</b> | Barrier-to-autointegration factor                             | 337  | Control |
| <b>Q641X3</b> | Beta-hexosaminidase subunit alpha                             | 90   | Control |
| <b>P07882</b> | Bile salt-activated lipase                                    | 77   | Control |
| <b>Q5BK10</b> | Calpain-13                                                    | 58   | Control |
| <b>P09456</b> | cAMP-dependent protein kinase type I-alpha regulatory subunit | 100  | Control |
| <b>Q63704</b> | Carnitine O-palmitoyltransferase 1_ muscle isoform            | 66   | Control |
| <b>P19139</b> | Casein kinase II subunit alpha                                | 126  | Control |
| <b>Q1M168</b> | Caytaxin                                                      | 579  | Control |
| <b>Q5M7A7</b> | CB1 cannabinoid receptor-interacting protein 1                | 1300 | Control |
| <b>O35112</b> | CD166 antigen                                                 | 102  | Control |
| <b>Q01134</b> | Choline kinase alpha                                          | 87   | Control |
| <b>P08082</b> | Clathrin light chain B                                        | 317  | Control |
| <b>Q99M76</b> | Cohesin subunit SA-3                                          | 85   | Control |
| <b>Q9Z1T4</b> | Connector enhancer of kinase suppressor of ras 2              | 54   | Control |
| <b>H1UBN0</b> | Copine-7                                                      | 128  | Control |
| <b>Q5BJS7</b> | Copine-9                                                      | 60   | Control |
| <b>Q9Z2F5</b> | C-terminal-binding protein 1                                  | 192  | Control |
| <b>Q99P39</b> | Cysteine desulfurase_ mitochondrial                           | 74   | Control |
| <b>P10715</b> | Cytochrome c_ testis-specific                                 | 185  | Control |
| <b>Q9QXU8</b> | Cytoplasmic dynein 1 light intermediate chain 1               | 89   | Control |
| <b>O35078</b> | D-amino-acid oxidase                                          | 200  | Control |
| <b>P36365</b> | Dimethylaniline monooxygenase [N-oxide-forming] 1             | 79   | Control |
| <b>Q01460</b> | Di-N-acetylchitobiase                                         | 78   | Control |
| <b>O55096</b> | Dipeptidyl peptidase 3                                        | 81   | Control |
| <b>O54747</b> | DNA polymerase delta catalytic subunit                        | 65   | Control |

|               |                                                                     |     |         |
|---------------|---------------------------------------------------------------------|-----|---------|
| <b>D3ZCM9</b> | Dynein assembly factor 3_ axonemal                                  | 47  | Control |
| <b>Q68FR6</b> | Elongation factor 1-gamma                                           | 123 | Control |
| <b>Q8K3M6</b> | ERC protein 2                                                       | 69  | Control |
| <b>B5DEH2</b> | Erlin-2                                                             | 126 | Control |
| <b>Q5RJL0</b> | Ermin                                                               | 129 | Control |
| <b>P85845</b> | Fascin                                                              | 73  | Control |
| <b>P02793</b> | Ferritin light chain 1                                              | 150 | Control |
| <b>O55145</b> | Fractalkine                                                         | 86  | Control |
| <b>B2RYW9</b> | Fumarylacetoacetate hydrolase domain-containing protein 2           | 211 | Control |
| <b>P38552</b> | Galectin-4                                                          | 98  | Control |
| <b>P04634</b> | Gastric triacylglycerol lipase                                      | 97  | Control |
| <b>Q9Z339</b> | Glutathione S-transferase omega-1                                   | 302 | Control |
| <b>Q0VGK4</b> | Glycerophosphodiester phosphodiesterase domain-containing protein 1 | 149 | Control |
| <b>G3V7G8</b> | Glycine--tRNA ligase                                                | 70  | Control |
| <b>P35053</b> | Glypican-1                                                          | 64  | Control |
| <b>Q4V7C6</b> | GMP synthase [glutamine-hydrolyzing]                                | 180 | Control |
| <b>D3ZZL9</b> | GRIP and coiled-coil domain-containing protein 2                    | 48  | Control |
| <b>Q925G1</b> | Hepatoma-derived growth factor-related protein 2                    | 52  | Control |
| <b>Q923W4</b> | Hepatoma-derived growth factor-related protein 3                    | 130 | Control |
| <b>P62749</b> | Hippocalcin-like protein 1                                          | 332 | Control |
| <b>P06349</b> | Histone H1t                                                         | 101 | Control |
| <b>Q9Z214</b> | Homer protein homolog 1                                             | 95  | Control |
| <b>O88801</b> | Homer protein homolog 2                                             | 95  | Control |
| <b>P50503</b> | Hsc70-interacting protein                                           | 151 | Control |
| <b>Q63692</b> | Hsp90 co-chaperone Cdc37                                            | 81  | Control |
| <b>Q63617</b> | Hypoxia up-regulated protein 1                                      | 108 | Control |
| <b>P20759</b> | Ig gamma-1 chain C region                                           | 150 | Control |
| <b>F1M5M3</b> | Inactive serine/threonine-protein kinase TEX14                      | 88  | Control |



|               |                                                               |     |         |
|---------------|---------------------------------------------------------------|-----|---------|
| <b>Q9QYE7</b> | Integrin alpha-D                                              | 63  | Control |
| <b>P56574</b> | Isocitrate dehydrogenase [NADP]_ mitochondrial                | 171 | Control |
| <b>Q6IMF3</b> | Keratin_ type II cytoskeletal 1                               | 41  | Control |
| <b>Q6IG02</b> | Keratin_ type II cytoskeletal 2 epidermal                     | 66  | Control |
| <b>Q6IG00</b> | Keratin_ type II cytoskeletal 4                               | 191 | Control |
| <b>Q4FZU2</b> | Keratin_ type II cytoskeletal 6A                              | 125 | Control |
| <b>Q6IG12</b> | Keratin_ type II cytoskeletal 7                               | 125 | Control |
| <b>Q6IG03</b> | Keratin_ type II cytoskeletal 73                              | 66  | Control |
| <b>Q6IG05</b> | Keratin_ type II cytoskeletal 75                              | 191 | Control |
| <b>Q10758</b> | Keratin_ type II cytoskeletal 8                               | 125 | Control |
| <b>Q64602</b> | Kynurenine/alpha-aminoadipate aminotransferase_ mitochondrial | 67  | Control |
| <b>Q6P7Q4</b> | Lactoylglutathione lyase                                      | 331 | Control |
| <b>P19629</b> | L-lactate dehydrogenase C chain                               | 146 | Control |
| <b>P15650</b> | Long-chain specific acyl-CoA dehydrogenase_ mitochondrial     | 91  | Control |
| <b>Q63341</b> | Macrophage metalloelastase                                    | 81  | Control |
| <b>Q62667</b> | Major vault protein                                           | 54  | Control |
| <b>Q5M7W5</b> | Microtubule-associated protein 4                              | 81  | Control |
| <b>Q5XIT1</b> | Microtubule-associated protein RP/EB family member 3          | 495 | Control |
| <b>Q62625</b> | Microtubule-associated proteins 1A/1B light chain 3B          | 438 | Control |
| <b>P22199</b> | Mineralocorticoid receptor                                    | 89  | Control |
| <b>Q4KM98</b> | Mitochondrial fission factor                                  | 156 | Control |
| <b>Q64119</b> | Myosin light polypeptide 6                                    | 331 | Control |
| <b>Q64122</b> | Myosin regulatory light polypeptide 9                         | 81  | Control |
| <b>Q62812</b> | Myosin-9                                                      | 69  | Control |
| <b>Q769K2</b> | N-acyl-phosphatidylethanolamine-hydrolyzing phospholipase D   | 104 | Control |
| <b>P28841</b> | Neuroendocrine convertase 2                                   | 58  | Control |
| <b>P12389</b> | Neuronal acetylcholine receptor subunit alpha-2               | 179 | Control |
| <b>P12392</b> | Neuronal acetylcholine receptor subunit beta-4                | 118 | Control |

|               |                                                         |     |         |
|---------------|---------------------------------------------------------|-----|---------|
| <b>Q62718</b> | Neurotrimin                                             | 98  | Control |
| <b>Q63525</b> | Nuclear migration protein nudC                          | 51  | Control |
| <b>Q6AYD9</b> | Nucleoside diphosphate-linked moiety X motif 19         | 116 | Control |
| <b>Q4R180</b> | Origin recognition complex subunit 3                    | 115 | Control |
| <b>Q4V8B0</b> | Oxidation resistance protein 1                          | 145 | Control |
| <b>Q9QVC8</b> | Peptidyl-prolyl cis-trans isomerase FKBP4               | 85  | Control |
| <b>P53812</b> | Phosphatidylinositol transfer protein beta isoform      | 109 | Control |
| <b>B1WBU8</b> | Pleckstrin homology domain-containing family D member 1 | 89  | Control |
| <b>Q66H20</b> | Polypyrimidine tract-binding protein 2                  | 77  | Control |
| <b>P20267</b> | POU domain_ class 3_ transcription factor 1             | 86  | Control |
| <b>P56222</b> | POU domain_ class 3_ transcription factor 2             | 86  | Control |
| <b>Q63262</b> | POU domain_ class 3_ transcription factor 3             | 86  | Control |
| <b>P62516</b> | POU domain_ class 3_ transcription factor 4             | 86  | Control |
| <b>P48679</b> | Prelamin-A/C                                            | 76  | Control |
| <b>A1A5S1</b> | Pre-mRNA-processing factor 6                            | 59  | Control |
| <b>Q80ZG5</b> | Pre-mRNA-splicing factor SLU7                           | 122 | Control |
| <b>Q9EPC6</b> | Profilin-2                                              | 318 | Control |
| <b>P83868</b> | Prostaglandin E synthase 3                              | 215 | Control |
| <b>Q5BK81</b> | Prostaglandin reductase 2                               | 72  | Control |
| <b>P18420</b> | Proteasome subunit alpha type-1                         | 212 | Control |
| <b>Q6MGD0</b> | Protein CutA                                            | 205 | Control |
| <b>Q63081</b> | Protein disulfide-isomerase A6                          | 150 | Control |
| <b>Q9Z250</b> | Protein lin-7 homolog A                                 | 136 | Control |
| <b>Q6JE36</b> | Protein NDRG1                                           | 205 | Control |
| <b>P35467</b> | Protein S100-A1                                         | 283 | Control |
| <b>P47709</b> | Rabphilin-3A                                            | 74  | Control |
| <b>Q62796</b> | RalA-binding protein 1                                  | 136 | Control |
| <b>Q5XXR3</b> | Rho guanine nucleotide exchange factor 6                | 76  | Control |

|                   |                                                                                   |     |         |
|-------------------|-----------------------------------------------------------------------------------|-----|---------|
| <b>Q68FQ7</b>     | RNA polymerase II-associated protein 3                                            | 71  | Control |
| <b>P47868</b>     | Secretogranin-3                                                                   | 110 | Control |
| <b>D4A2H2</b>     | Serine palmitoyltransferase_ long chain base subunit 1                            | 188 | Control |
| <b>D3ZHP7</b>     | Serine/threonine-protein kinase ULK3                                              | 76  | Control |
| <b>P36876</b>     | Serine/threonine-protein phosphatase 2A 55 kDa regulatory subunit B alpha isoform | 96  | Control |
| <b>Q4PJT6</b>     | Spermatogenesis-associated protein 24                                             | 97  | Control |
| <b>Q6PEC4</b>     | S-phase kinase-associated protein 1                                               | 802 | Control |
| <b>P32851</b>     | Syntaxin-1A                                                                       | 96  | Control |
| <b>Q66HA4</b>     | Tax1-binding protein 1 homolog                                                    | 48  | Control |
| <b>Q5CD77</b>     | TBC1 domain family member 14                                                      | 116 | Control |
| <b>Q4V8G8</b>     | Tektin-3                                                                          | 76  | Control |
| <b>Q9Z311</b>     | Trans-2-enoyl-CoA reductase_ mitochondrial                                        | 94  | Control |
| <b>P26342</b>     | Transforming growth factor beta receptor type 3                                   | 71  | Control |
| <b>Q6AY76</b>     | Transmembrane protein 248                                                         | 114 | Control |
| <b>A0A0G2JXN2</b> | Tripartite motif protein 46 (Predicted)                                           | 80  | Control |
| <b>Q64560</b>     | Tripeptidyl-peptidase 2                                                           | 79  | Control |
| <b>Q6PCT3</b>     | Tumor protein D54                                                                 | 122 | Control |
| <b>Q7M767</b>     | Ubiquitin-conjugating enzyme E2 variant 2                                         | 878 | Control |
| <b>Q4KM73</b>     | UMP-CMP kinase                                                                    | 243 | Control |
| <b>P62762</b>     | Visinin-like protein 1                                                            | 386 | Control |
| <b>Q8VHW7</b>     | Voltage-dependent calcium channel gamma-6 subunit                                 | 90  | Control |
| <b>Q9ERH3</b>     | WD repeat-containing protein 7                                                    | 60  | Control |
| <b>P35738</b>     | 2-oxoisovalerate dehydrogenase subunit beta_ mitochondrial                        | 102 | MeHg    |
| <b>P62909</b>     | 40S ribosomal protein S3                                                          | 62  | MeHg    |
| <b>O35552</b>     | 6-phosphofructo-2-kinase/fructose-2_6-bisphosphatase 3                            | 58  | MeHg    |
| <b>Q8VH46</b>     | Actin filament-associated protein 1                                               | 60  | MeHg    |
| <b>P69682</b>     | Adaptin ear-binding coat-associated protein 1                                     | 165 | MeHg    |

|                        |                                                    |     |      |
|------------------------|----------------------------------------------------|-----|------|
| <b>P13601</b>          | Aldehyde dehydrogenase_ cytosolic 1                | 66  | MeHg |
| <b>P08592</b>          | Amyloid-beta precursor protein                     | 75  | MeHg |
| <b>Q5U312</b>          | Ankycorbin                                         | 55  | MeHg |
| <b>F1LQ70</b>          | Arachidonate 12-lipoxygenase_ 12S-type             | 93  | MeHg |
| <b>P50430</b>          | Arylsulfatase B                                    | 101 | MeHg |
| <b>D3ZAF6</b>          | ATP synthase subunit f_ mitochondrial              | 683 | MeHg |
| <b>Q9QY44</b>          | ATP-binding cassette sub-family D member 2         | 96  | MeHg |
| <b>Q701R3</b>          | Beta-galactoside alpha-2_6-sialyltransferase 2     | 58  | MeHg |
| <b>O88881</b>          | Brain-enriched guanylate kinase-associated protein | 74  | MeHg |
| <b>P24268</b>          | Cathepsin D                                        | 274 | MeHg |
| <b>P23505</b>          | Cell surface glycoprotein gp42                     | 178 | MeHg |
| <b>P18395</b>          | Cold shock domain-containing protein E1            | 74  | MeHg |
| <b>P00564</b>          | Creatine kinase M-type                             | 55  | MeHg |
| <b>P97536</b>          | Cullin-associated NEDD8-dissociated protein 1      | 46  | MeHg |
| <b>Q63270</b>          | Cytoplasmic aconitate hydratase                    | 80  | MeHg |
| <b>Q68FS4</b>          | Cytosol aminopeptidase                             | 137 | MeHg |
| <b>Q8CF97</b>          | Deubiquitinating protein VCIP135                   | 67  | MeHg |
| <b>P55266</b>          | Double-stranded RNA-specific adenosine deaminase   | 48  | MeHg |
| <b>P51400</b>          | Double-stranded RNA-specific editase 1             | 77  | MeHg |
| <b>B5DF91</b>          | ELAV-like protein 1                                | 79  | MeHg |
| <b>Q8CH84</b>          | ELAV-like protein 2                                | 104 | MeHg |
| <b>O09032</b>          | ELAV-like protein 4                                | 104 | MeHg |
| <b>A0A140TAF<br/>2</b> | ELAV-like protein                                  | 104 | MeHg |
| <b>Q499U2</b>          | Engulfment and cell motility protein 3             | 158 | MeHg |
| <b>P54759</b>          | Ephrin type-A receptor 7                           | 48  | MeHg |
| <b>Q5XI72</b>          | Eukaryotic translation initiation factor 4H        | 156 | MeHg |
| <b>Q04931</b>          | FACT complex subunit SSRP1                         | 66  | MeHg |

|        |                                                                             |     |      |
|--------|-----------------------------------------------------------------------------|-----|------|
| D3ZHA0 | Filamin-C                                                                   | 43  | MeHg |
| O88387 | FYVE_ RhoGEF and PH domain-containing protein 4                             | 53  | MeHg |
| O09028 | Gamma-aminobutyric acid receptor subunit pi                                 | 89  | MeHg |
| Q63226 | Glutamate receptor ionotropic_ delta-2                                      | 58  | MeHg |
| P30713 | Glutathione S-transferase theta-2                                           | 233 | MeHg |
| P46413 | Glutathione synthetase                                                      | 93  | MeHg |
| Q5I0P2 | Glycine cleavage system H protein_ mitochondrial                            | 358 | MeHg |
| Q6AYR6 | Haloacid dehalogenase-like hydrolase domain-containing protein 2            | 92  | MeHg |
| P27926 | Hexokinase-3                                                                | 72  | MeHg |
| Q5XI06 | Histone acetyltransferase KAT8                                              | 73  | MeHg |
| D4A1C2 | Junction adhesion molecule-like                                             | 78  | MeHg |
| Q6IFU7 | Keratin_ type I cytoskeletal 42                                             | 117 | MeHg |
| Q6IG04 | Keratin_ type II cytoskeletal 72                                            | 67  | MeHg |
| Q91V33 | KH domain-containing_ RNA-binding_ signal transduction-associated protein 1 | 74  | MeHg |
| F1M4A4 | Kinesin family member 1A                                                    | 89  | MeHg |
| Q811X6 | Lambda-crystallin homolog                                                   | 96  | MeHg |
| Q5XIN6 | LETM1 and EF-hand domain-containing protein 1_ mitochondrial                | 92  | MeHg |
| P30349 | Leukotriene A-4 hydrolase                                                   | 61  | MeHg |
| P10867 | L-gulonolactone oxidase                                                     | 47  | MeHg |
| D3ZAP3 | Microtubule-associated protein 10                                           | 57  | MeHg |
| Q9Z2A6 | Mitogen-activated protein kinase 15                                         | 78  | MeHg |
| D3ZG83 | Mitogen-activated protein kinase kinase kinase 10                           | 56  | MeHg |
| O55164 | Multiple PDZ domain protein                                                 | 35  | MeHg |
| Q80W89 | NADH dehydrogenase [ubiquinone] 1 alpha subcomplex subunit 11               | 540 | MeHg |
| P55161 | Nck-associated protein 1                                                    | 90  | MeHg |
| P49791 | Nuclear pore complex protein Nup153                                         | 71  | MeHg |
| Q9ES54 | Nuclear protein localization protein 4 homolog                              | 48  | MeHg |
| Q8R5M4 | Optineurin                                                                  | 48  | MeHg |

|               |                                                                                   |     |      |
|---------------|-----------------------------------------------------------------------------------|-----|------|
| <b>Q9JLN4</b> | Peptidoglycan recognition protein 1                                               | 91  | MeHg |
| <b>Q9Z1L0</b> | Phosphatidylinositol 4_5-bisphosphate 3-kinase catalytic subunit beta isoform     | 48  | MeHg |
| <b>Q6AYN4</b> | Phytanoyl-CoA hydroxylase-interacting protein-like                                | 164 | MeHg |
| <b>P11505</b> | Plasma membrane calcium-transporting ATPase 1                                     | 63  | MeHg |
| <b>P20786</b> | Platelet-derived growth factor receptor alpha                                     | 55  | MeHg |
| <b>Q05030</b> | Platelet-derived growth factor receptor beta                                      | 67  | MeHg |
| <b>O88758</b> | Potassium voltage-gated channel subfamily S member 1                              | 80  | MeHg |
| <b>D3ZFB6</b> | Proline-rich transmembrane protein 2                                              | 151 | MeHg |
| <b>P23606</b> | Protein-glutamine gamma-glutamyltransferase K                                     | 87  | MeHg |
| <b>P70600</b> | Protein-tyrosine kinase 2-beta                                                    | 31  | MeHg |
| <b>Q6AYT0</b> | Quinone oxidoreductase                                                            | 93  | MeHg |
| <b>F1M386</b> | Rap guanine nucleotide exchange factor 2                                          | 29  | MeHg |
| <b>Q62656</b> | Receptor-type tyrosine-protein phosphatase zeta                                   | 33  | MeHg |
| <b>O08774</b> | Regulator of G-protein signaling 12                                               | 53  | MeHg |
| <b>P49803</b> | Regulator of G-protein signaling 7                                                | 48  | MeHg |
| <b>O55005</b> | Roundabout homolog 1                                                              | 156 | MeHg |
| <b>Q6AY30</b> | Saccharopine dehydrogenase-like oxidoreductase                                    | 86  | MeHg |
| <b>Q5EB96</b> | Septin-1                                                                          | 58  | MeHg |
| <b>Q62726</b> | Serine/threonine-protein kinase ICK                                               | 103 | MeHg |
| <b>Q9R011</b> | Serine/threonine-protein kinase PLK3                                              | 83  | MeHg |
| <b>D3ZMK9</b> | Similar to DNA segment_ Chr 8_ ERATO Doi 82_ expressed (Predicted)_ isoform CRA_a | 66  | MeHg |
| <b>Q63633</b> | Solute carrier family 12 member 5                                                 | 70  | MeHg |
| <b>Q66HR0</b> | Solute carrier family 12 member 9                                                 | 56  | MeHg |
| <b>Q7TNZ6</b> | STE20-related kinase adapter protein alpha                                        | 85  | MeHg |
| <b>P97690</b> | Structural maintenance of chromosomes protein 3                                   | 45  | MeHg |
| <b>P21913</b> | Succinate dehydrogenase [ubiquinone] iron-sulfur subunit_ mitochondrial           | 128 | MeHg |
| <b>Q68FU8</b> | SURP and G-patch domain-containing protein 1                                      | 54  | MeHg |
| <b>Q02563</b> | Synaptic vesicle glycoprotein 2A                                                  | 46  | MeHg |

|               |                                                                  |     |      |
|---------------|------------------------------------------------------------------|-----|------|
| <b>P97610</b> | Synaptotagmin-12                                                 | 175 | MeHg |
| <b>Q9Z220</b> | Testis-specific gene 10 protein                                  | 62  | MeHg |
| <b>Q6AY87</b> | THO complex subunit 6 homolog                                    | 83  | MeHg |
| <b>Q5XHY5</b> | Threonine--tRNA ligase_ cytoplasmic                              | 44  | MeHg |
| <b>Q9EPI8</b> | Transcription termination factor 1_ mitochondrial                | 54  | MeHg |
| <b>Q925B3</b> | Transient receptor potential cation channel subfamily M member 7 | 59  | MeHg |
| <b>Q8K582</b> | tRNA-dihydrouridine(16/17) synthase [NAD(P)(+)]-like             | 66  | MeHg |
| <b>Q6P7B0</b> | Tryptophan--tRNA ligase_ cytoplasmic                             | 126 | MeHg |
| <b>Q5U2Y6</b> | Tuftelin-interacting protein 11                                  | 46  | MeHg |
| <b>Q5RJR2</b> | Twinfilin-1                                                      | 99  | MeHg |
| <b>Q9QWG5</b> | Type II inositol 3_4-bisphosphate 4-phosphatase                  | 83  | MeHg |
| <b>P32577</b> | Tyrosine-protein kinase CSK                                      | 70  | MeHg |
| <b>P41499</b> | Tyrosine-protein phosphatase non-receptor type 11                | 48  | MeHg |
| <b>Q4VSI4</b> | Ubiquitin carboxyl-terminal hydrolase 7                          | 49  | MeHg |
| <b>P53767</b> | Vascular endothelial growth factor receptor 1                    | 79  | MeHg |
| <b>O08775</b> | Vascular endothelial growth factor receptor 2                    | 62  | MeHg |
| <b>Q91ZT1</b> | Vascular endothelial growth factor receptor 3                    | 63  | MeHg |
| <b>G3V893</b> | Zinc finger protein 335                                          | 66  | MeHg |

<sup>a</sup>Accession ID according to Uniport.org database. Positive and negative values of fold change indicate up- and down-regulated proteins, respectively. The identification with MeHg or Control in the fourth column means exclusive expression in the exposed or control group, respectively. Results of the comparison between the MeHg group *versus* the control group.
